# Supplementary material
Source: Springer Nature journal article supplement (https://www.springermedizin.de/resource/supplementary/12890_2006_77_MOESM4_ESM.pdf/9505968)

Mean  
ACQ  
score

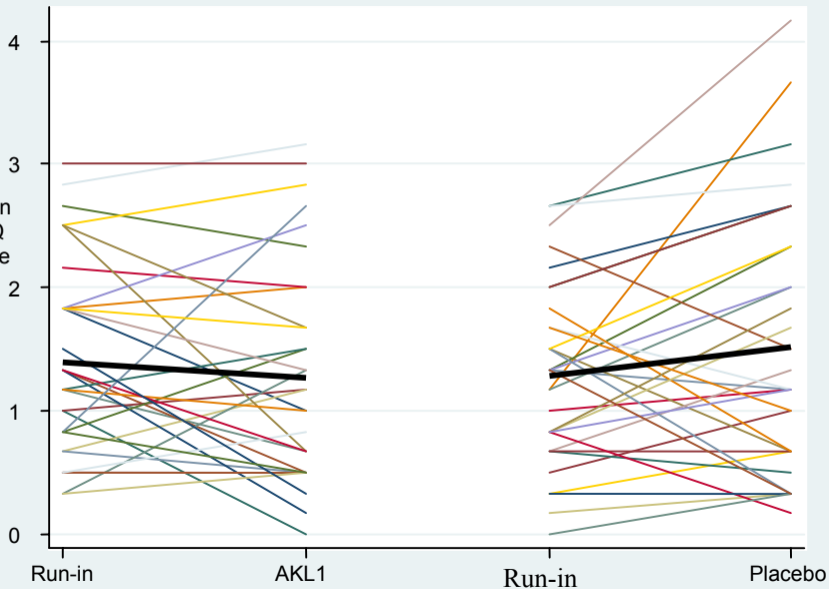

Supplement: MOESM4 [file 9505968]
